# Supplementary material for: Au@SiO2 nanoparticles coupling co-sensitizers for synergic efficiency enhancement of dye sensitized solar cells
Source: Royal Society of Chemistry journal article supplement (doi:10.1039/c2jm35577a), 2012-01-01
Supplement: c2jm35577a.pdf [file c2jm35577a.pdf]

## Supporting information

### **Au@SiO<sub>2</sub> nanoparticles coupling co-sensitizers for synergic efficiency enhancement of dye sensitized solar cells**

**Haoran Li<sup>a</sup>, Wei Hong<sup>a</sup>, Feiyang Cai<sup>a</sup>, Qi Tang<sup>a</sup>, Yang Yan<sup>a</sup>, Xiaobin Hu<sup>\*a</sup>, Binyuan Zhao<sup>a</sup>, Di Zhang<sup>a</sup>, and Zhou Xu<sup>a</sup>**

<sup>a</sup> *State Key Lab of Metal Matrix Composites,  
School of Materials Science and Engineering,  
Shanghai Jiaotong University,  
Shanghai 200240, China.  
hxb@sjtu.edu.cn (X. Hu);  
Fax: 86 21 34202843; Tel: 86 21 3420 2843*

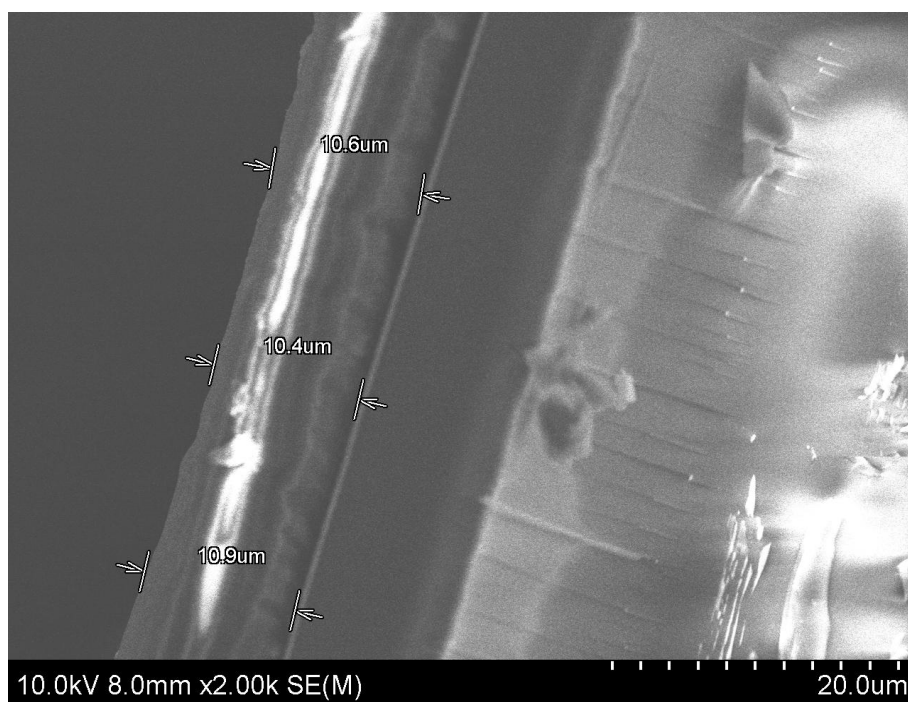

**Figure S1.** Side view of TiO<sub>2</sub> electrode. The thickness is about 10.5 μm.

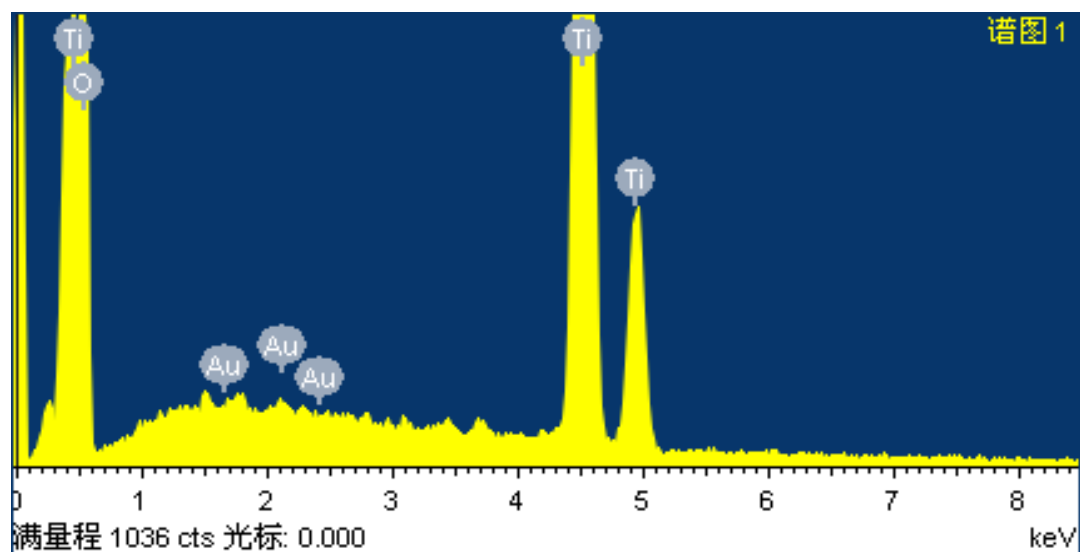

**Figure S2.** EDS (Energy Diffraction Spectrum) of the electrode incorporating with Au@SiO<sub>2</sub> nanoparticles.

**Table S1.** The element composition of electrode

| Elements | Weight(%) | Atom Quantity (%) |
|----------|-----------|-------------------|
| O K      | 43.81     | 70.05             |
| Ti K     | 56.04     | 29.93             |
| Au M     | 0.16      | 0.02              |
| total    | 100.00    |                   |

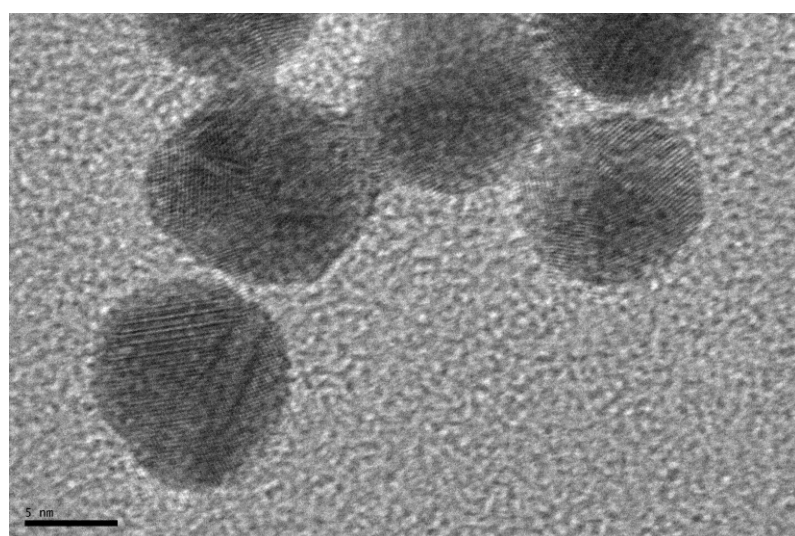

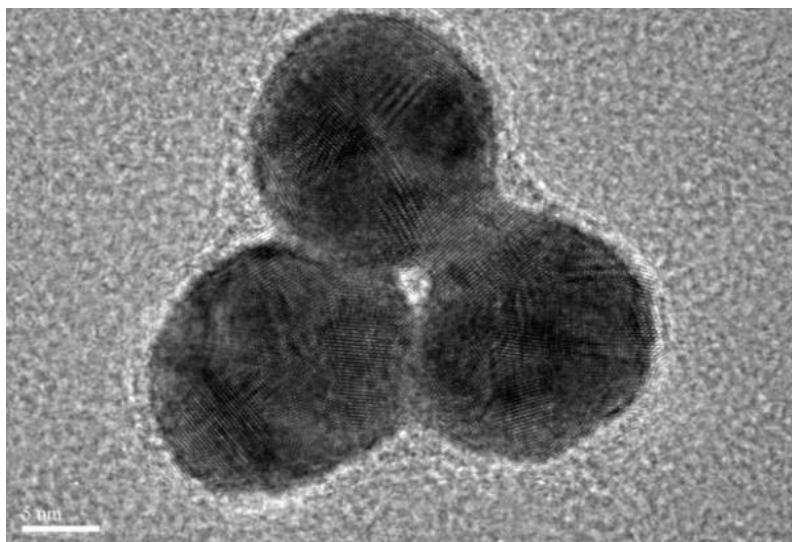

**Figure S2.** TEM photograph of bare Au nanoparticles (the first one) and Au@SiO<sub>2</sub> nanoparticles (the second one)

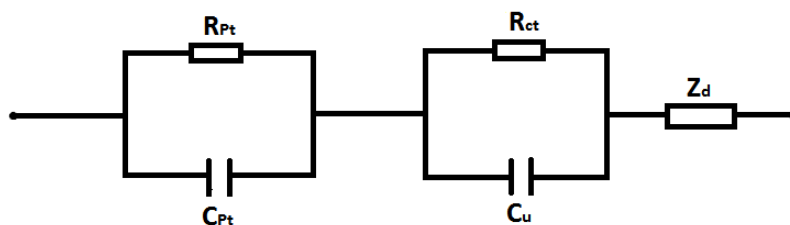

**Figure S3.** Simulation circuit to model the DSSC.  $R_{Pt}$  and  $C_{Pt}$  stand for the resistance and capacitance on the interface of electrolyte and Pt doped counter electrode.  $R_{ct}$  and  $C_u$  represent the resistance and capacitance on the interface of TiO<sub>2</sub> electrode and electrode.  $Z_d$  is the impedance of  $I^-/I_3^-$  diffusing in electrolyte.

**Table S2.** The values of resistances obtained from the simulation for different samples.

|                       | TiO <sub>2</sub> +N3 | TiO <sub>2</sub> +N3+N719 | TiO <sub>2</sub> +Au+N3+N719 |
|-----------------------|----------------------|---------------------------|------------------------------|
| $R_{Pt}$ ( $\Omega$ ) | 1.628                | 2.319                     | 1.094                        |
| $R_{ct}$ ( $\Omega$ ) | 7.821                | 16.300                    | 12.750                       |
